# Supplementary material for: Inference of Type-Specific HPV Transmissibility, Progression and Clearance Rates: A Mathematical Modelling Approach
Source: PLoS One. 2012 Nov 21;7(11):e49614. doi: 10.1371/journal.pone.0049614 (PMC3504161; doi:10.1371/journal.pone.0049614)
Supplement: Supplementary Material S1 — (DOCX) [file pone.0049614.s003.docx]

# Supporting information

## HPV transmission model equations

**Females**

**Males**

where

: persons of gender, *g* , and age, *a*, who are susceptible to HPV type at time *t*

: persons of gender, *g* , and age, *a* , who are infected with initial HPV type at time *t*

: women of gender, *g* , and age, *a*, who have CIN1-type lesions attributable to HPV type at time *t*

: women of gender, *g* , and age, *a*, who have CIN2-type lesions attributable to HPV type at time *t*

: women of gender, *g* , and age, *a*, who have CIN3-type lesions attributable to HPV type at time *t*

: women of gender, *g* , and age, *a*, who have cancer attributable to HPV type at time *t*

: persons of gender, *g* , and age, *a*, who are resistant to HPV type at time *t*

: population size of gender, *g*

: force of infection acting on persons of gender, *g* , and sexual activity group, *i*

: annual rate of loss of naturally-acquired immunity

: annual rate of progression from initial infection to CIN1-type lesions

: annual rate of progression from CIN1-type lesions to CIN2-type lesions

: annual rate of progression from CIN2-type lesions to CIN3-type lesions

: annual rate of progression from CIN3-type lesions to cancer

: annual rate of clearance of initial infection

: annual rate of clearance of CIN1-type lesions

: annual rate of clearance of CIN2-type lesions

: combined rate for screening and subsequent treatment of lesions

: birth rate

: natural-cause mortality

: rate or mortality due to cervical cancer
